# Supplementary material for: GSK-3β Is Required for Memory Reconsolidation in Adult Brain
Source: PubMed Central journal article supplement (PMC2568810; doi:10.1371/journal.pone.0003540), 2008-10-28

**A**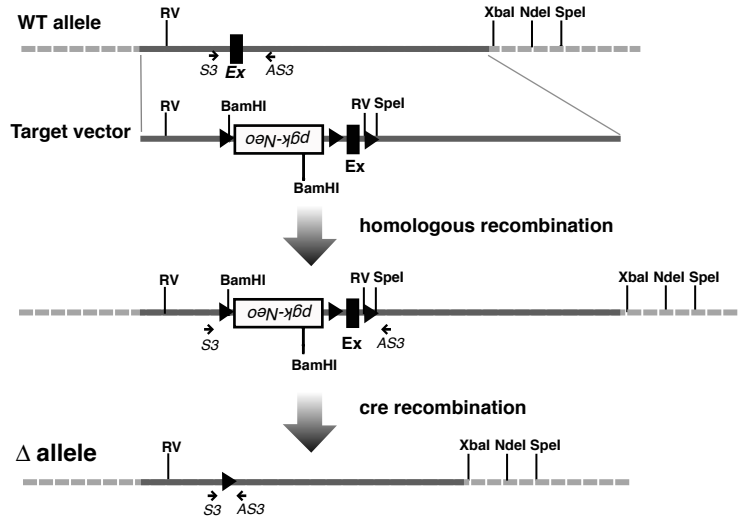**B**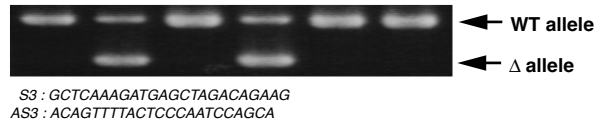**C**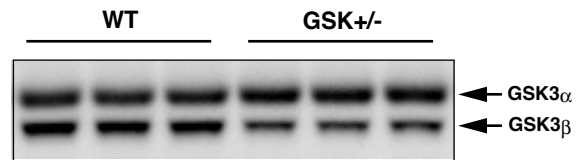**D**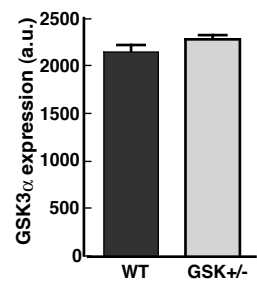**E**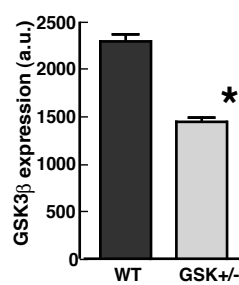**F**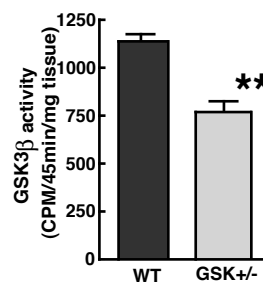

Supplement: pone.0003540.s001.pdf [file pone.0003540.s001.pdf]
