# Supplementary material for: GSK-3β Is Required for Memory Reconsolidation in Adult Brain
Source: PubMed Central journal article supplement (PMC2568810; doi:10.1371/journal.pone.0003540), 2008-10-28

**A**

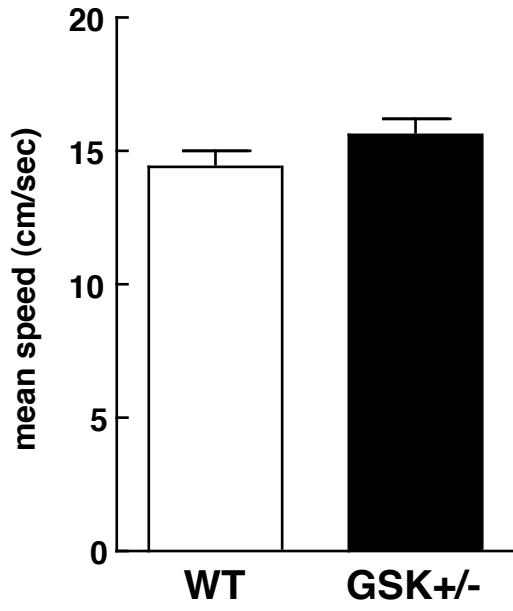

**B**

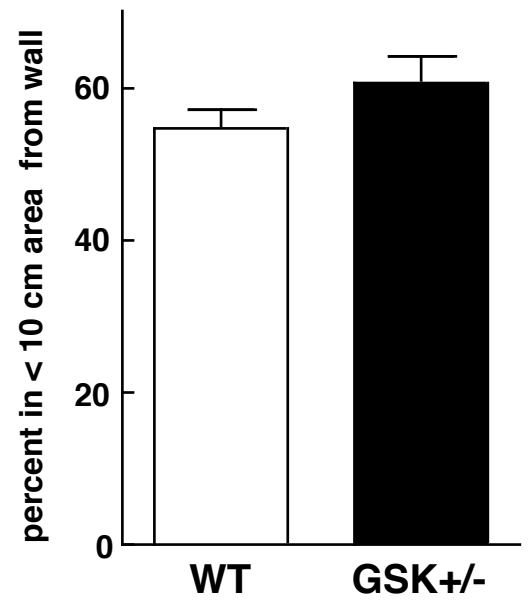

Supplement: pone.0003540.s004.pdf [file pone.0003540.s004.pdf]
