# Supplementary material for: GSK-3β Is Required for Memory Reconsolidation in Adult Brain
Source: PubMed Central journal article supplement (PMC2568810; doi:10.1371/journal.pone.0003540), 2008-10-28

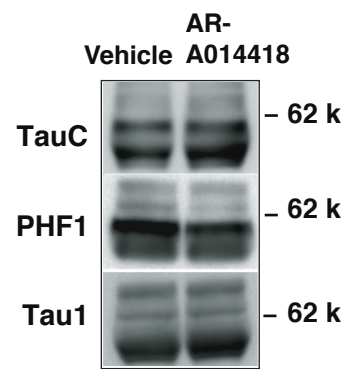

Supplement: pone.0003540.s006.pdf [file pone.0003540.s006.pdf]
